# Supplementary material for: A proof of concept for cooperation from the quinone groups adjacent to N sites during the metal-free oxidation of glycerol by nitrogen-rich graphene oxide
Source: Royal Society of Chemistry journal article supplement (doi:10.1039/d1nj04226b), 2021-01-01
Supplement: d1nj04226b1.pdf [file d1nj04226b1.pdf]

## Supporting Information

### A proof of concept for the cooperation from the adjacent quinone groups to N sites during the metal free oxidation of glycerol by nitrogen rich graphene oxide

Ashima Dogra<sup>†a</sup>, Vinit Sharma<sup>†a</sup>, Ilaria Barlocco<sup>b</sup>, Alberto Villa<sup>b</sup>, Neeraj Gupta<sup>a,c\*</sup>

<sup>a</sup> School of Advanced Chemical Sciences, Shoolini University, Bajhol, P.O. Sultanpur, Solan – 173229 (H.P.) India

<sup>b</sup> Dipartimento di Chimica Università degli Studi di Milano Via golgi 19, 20133 Milano (Italy)

<sup>c</sup> Department of Chemistry and Chemical Sciences, Central University of Himachal Pradesh, Shahpur, Kangra (HP), Pin-176215, India,  
E-Mail: gupta\_nrj@yahoo.com

<sup>†</sup> These authors contributed equally to this work.

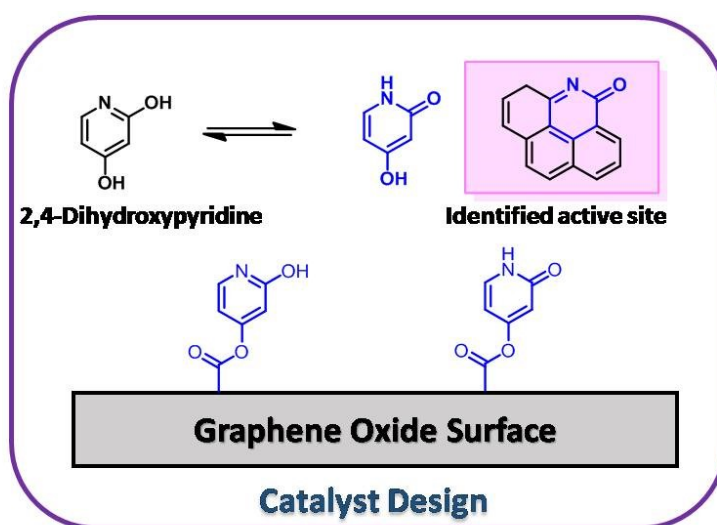

Figure S1: 2,4-dihydroxypyridine (DHP) functionalized graphene oxide catalyst

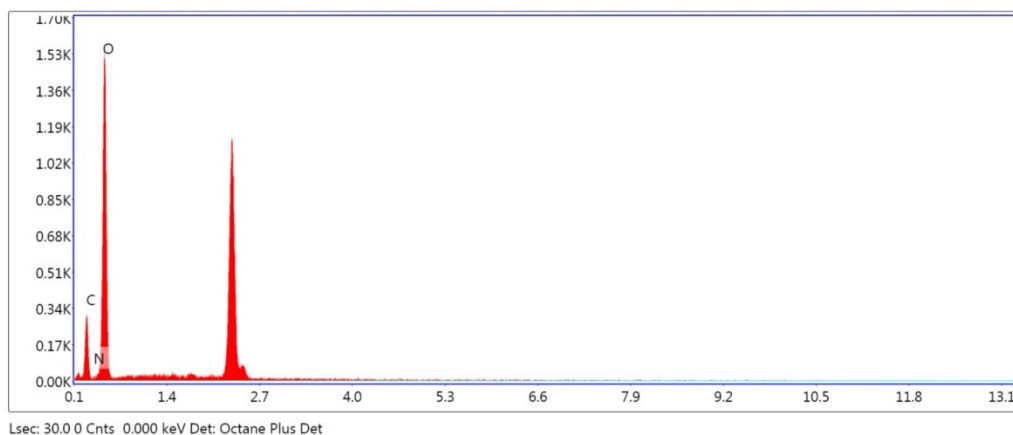

Figure S2: The EDX spectrum showing the elements on the surface of DHP@GO catalyst

## Experimental Section

**Chemicals:** Glycerol and tert-butyl hydroperoxide (TBHP) were purchased from Sigma-Aldrich. 2,4-dihydroxy pyridine (99.4%) was purchased from Alfa Aesar and graphene oxide (99%) was purchased from Platonic Nanotech Pvt. Ltd. Ammonia (99.5%) and sulphuric acid ( $H_2SO_4$ ) were purchased from Loba Chemie Pvt. Ltd.

**Characterization:** The surface morphology of the material was studied by transmission electron microscopy (TEM) by using Technai G2s-Twinhigh resolution transmission electron microscope (FEI). The EDX spectrum was obtained along with TEM by using model FP 5022/22-Tecnai G2 20 S-TWIN instrument. The crystalline nature of the materials was studied by powder X-Ray diffraction (XRD) technique using the SmartLab model diffractometer. The Fourier transform infrared spectroscopy (FTIR) spectra were recorded using L1600312 spectrum TWOLITA/ZnSe (Agilent Technologies) for confirming the functionality. X-Ray photoelectron microscopy (XPS) data was obtained by PHI 5000 Versa ProBII, FEI Inc. and Prevac.

**Catalyst preparation:** The nanocomposite material DHP@GO was synthesized by refluxing 2,4-dihydroxy pyridine (40 mg) with GO (200 mg) by adding few drops of  $H_2SO_4$  in  $H_2O$  (5ml) at 50° C for 2 hours. After the end of the reaction, the catalyst was filter with whatman filter paper and dries the sample in an oven at 50° C for 24 hours. Moreover,  $CONH_2$ @GO was synthesized by refluxing ammonia (40mg) with GO (200mg) and acidify with few drops of  $H_2SO_4$  in  $H_2O$  (5ml) at 50° C for 2 hours. In the end of the reaction, the material  $CONH_2$ @GO was filter and dries the sample for 24 hours in an oven at 50° C.

**Glycerol oxidation:** The catalytic glycerol oxidation reaction, performed in a stainless steel reactor equipped with heater, mechanical stirrer, gas supply system and thermometer. Glycerol (3 mmol), and TBHP 6 mmol (TBHP 70% in water), glycerol/catalyst 5/1 wt/wt, were mixed in distilled water under 1250 rpm at 60°C. After the end of the reaction, the reactor was cooled down at room temperature. Samples were removed periodically (0.2 mL) and HP 7820A gas chromatograph equipped with a capillary column HP-5 30m x 0.32mm, 0.25  $\mu$ m Film, by Agilent Technologies. Identification of the products was completed by using a Thermo Scientific Trace ISQ QD Single Quadrupole GC-MS equipped with a capillary column HP-5 30 m x 0.32 mm, 0.25  $\mu$ m Film, by Agilent Technologies.
